# Supplementary material
Source: PubMed Central journal article supplement (PMC4103599)

## **methyIC Track: Visual integration of single-base resolution DNA methylation data on the WashU EpiGenome Browser**

Xin Zhou, Daofeng Li, Rebecca F. Lowdon, Joseph F. Costello, Ting Wang

### **Supplementary note**

The most up-to-date descriptions and instructions about the methyIC track can be found in this website: <http://epigenomegateway.wustl.edu/+/cmtk/>

### **Notes on the H1ES and IMR90 methyIC-seq tracks used in this manuscript**

The H1ES and IMR90 methyIC-seq experiment results are from the publication of Lister R. et. al., “Human DNA methylomes at base resolution show widespread epigenomic differences”, (doi: 10.1038/nature08514). We downloaded the cytosine methylation call data from the authors’ website ([http://neomorph.salk.edu/human\\_methylome/data.html](http://neomorph.salk.edu/human_methylome/data.html)). For each cell line, we converted the data into 8 bedGraph files which were assembled into a methyIC track for display (see Fig. 1a in main text). These methyIC tracks can be accessed or downloaded from <http://vizhub.wustl.edu/public/hg18/pmid19829295/hub>.

For demonstration purpose we used methylation call data for all CG cytosines, but CHG/CHH cytosines, we only included methylated ones (methylation level >0). All unmethylated CHG/CHH cytosines were excluded. This is for demonstration purpose only, and is based on the fact that vast majority of CHG and CHH cytosines are unmethylated and are generally less biologically relevant compared to unmethylated CG cytosines. However, our methyIC track is able to distinguish unmethylated cytosines from being lack of measurement in all contexts (CG, CHG, CHH), as described in main text. And we give full control to investigators over whether to include unmethylated CHG/CHH cytosines when preparing custom methyIC tracks.

### **Supplementary figures**

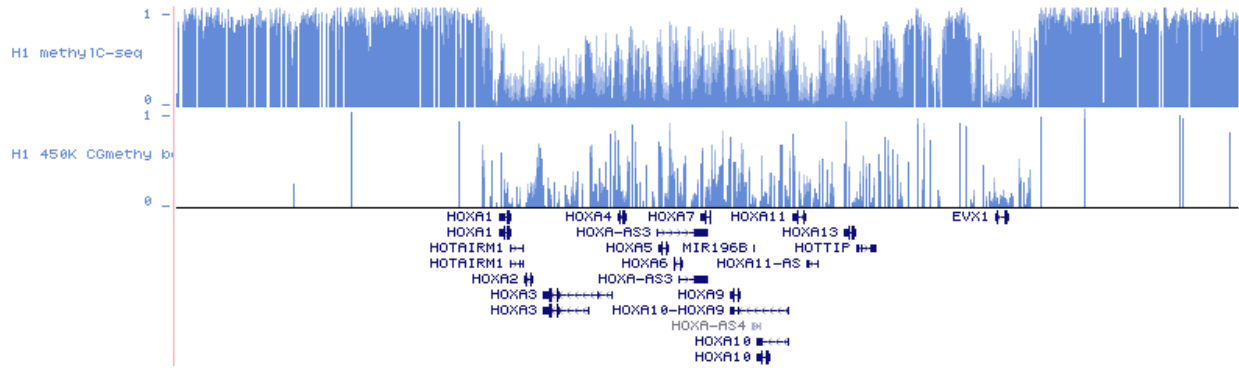

**Supplementary figure 1:** DNA methylation tracks displayed on the UCSC Genome Browser. Bar plots are used to indicate methylation levels at measured CpG sites. The track on the top is a methylC-seq experiment (GSM429321), the track on the bottom is an Infinium 450K array experiment (GSM999379). Both experiments are on human H1 embryonic stem cells. Data from two strands are combined for the methylC-seq track. Data is shown over the HOXA gene cluster same as Fig. 1b in the main text.

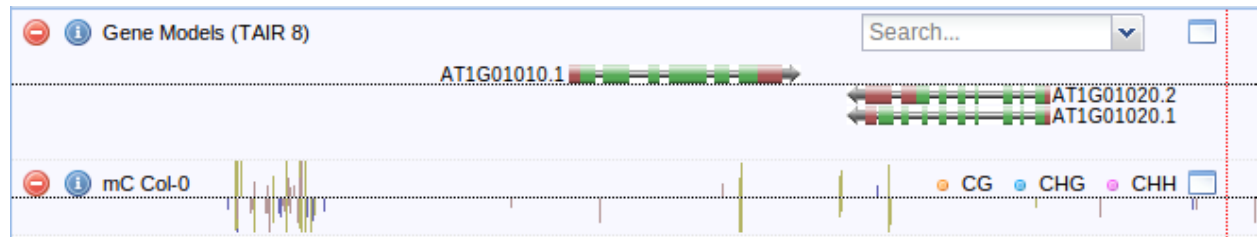

**Supplementary figure 2:** A whole genome bisulfite sequencing track is shown on the AnnoJ genome browser (<http://neomorph.salk.edu/epigenome/epigenome.html>). It displays strand-specific cytosine methylation levels, and distinguishes cytosines at different context (CG, CHG, CHH) with different bar colors.

Supplementary figure 3b

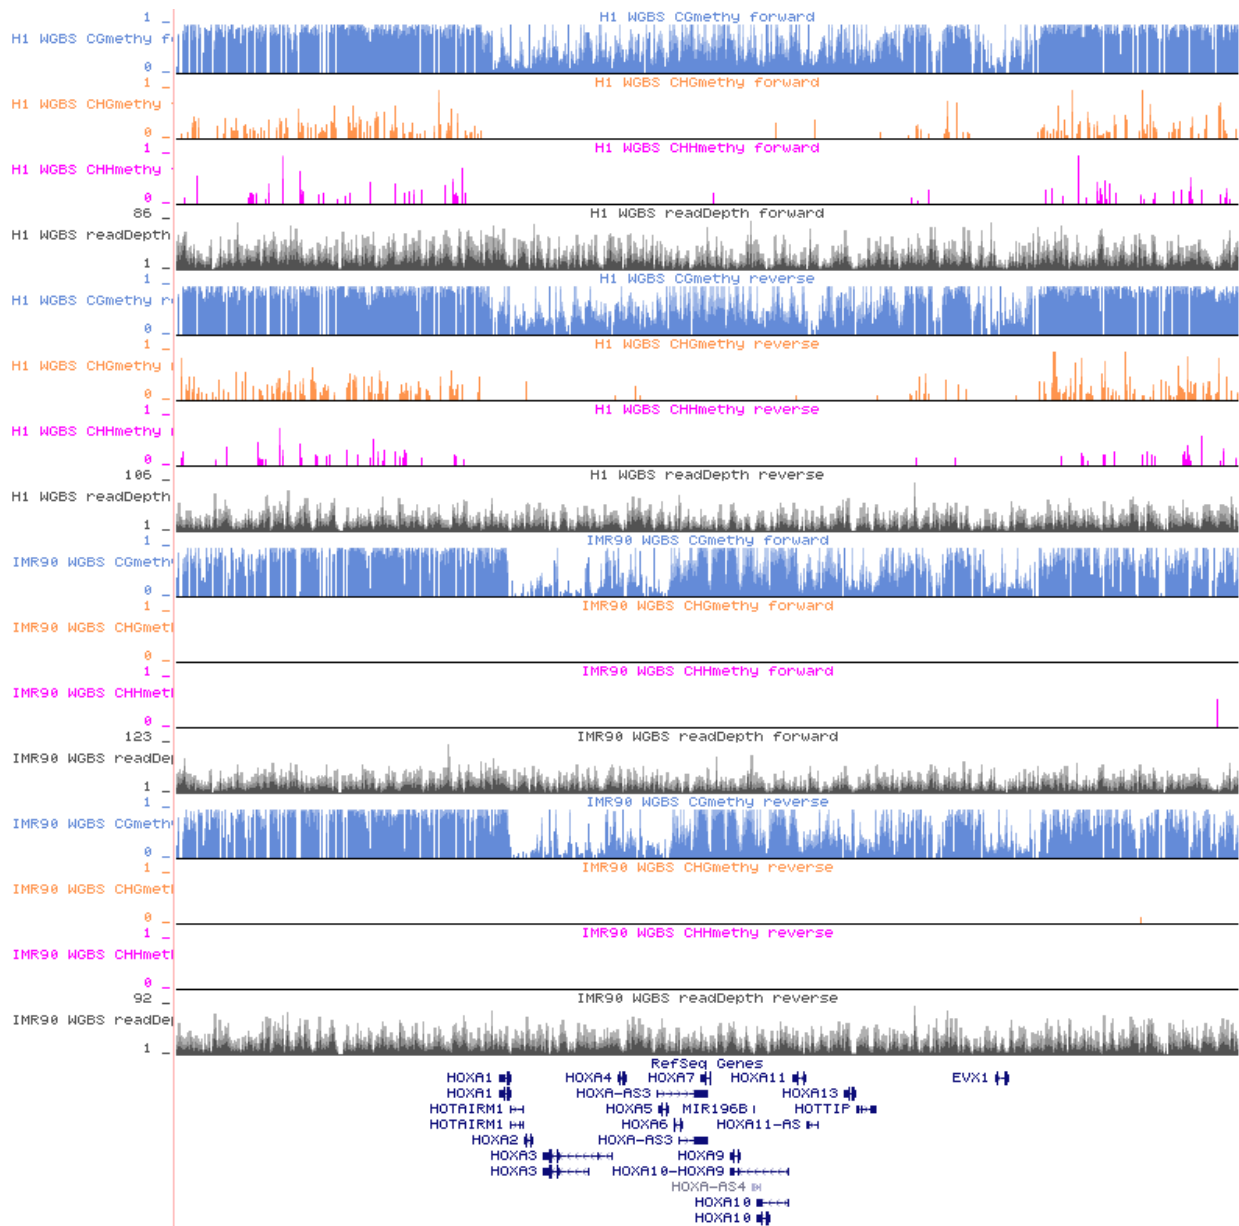

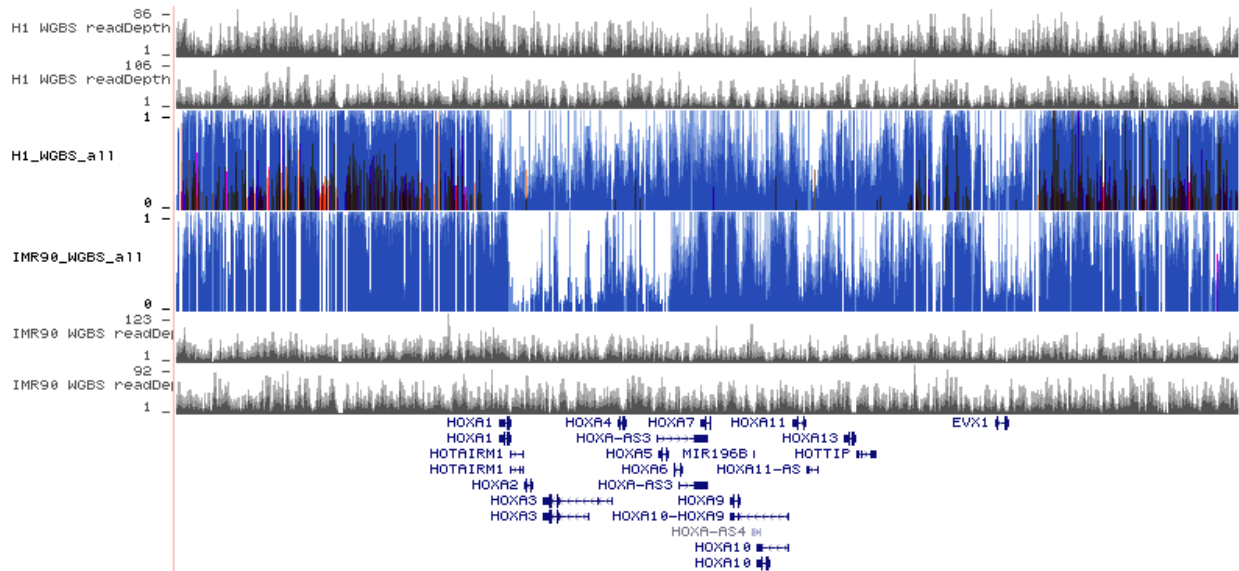

**Supplementary figure 3:** Display of the H1 ESC and IMR90 methylC-seq data in UCSC Genome Browser. The H1 ESC and IMR90 methylC-seq experiment data is the same as that used in Fig. 1b of main text. Cytosine methylation levels are presented on separate strands, and separate colors are used for different cytosine context (blue for CG, orange for CHG, magenta for CHH). Black color is used for read depth tracks. (a) Separate tracks were used to display strand-specific CG/CHG/CHH methylation data. (b) “multiWig” overlaying display method was used to display CG/CHG/CHH methylation levels from separate strands all in one track.



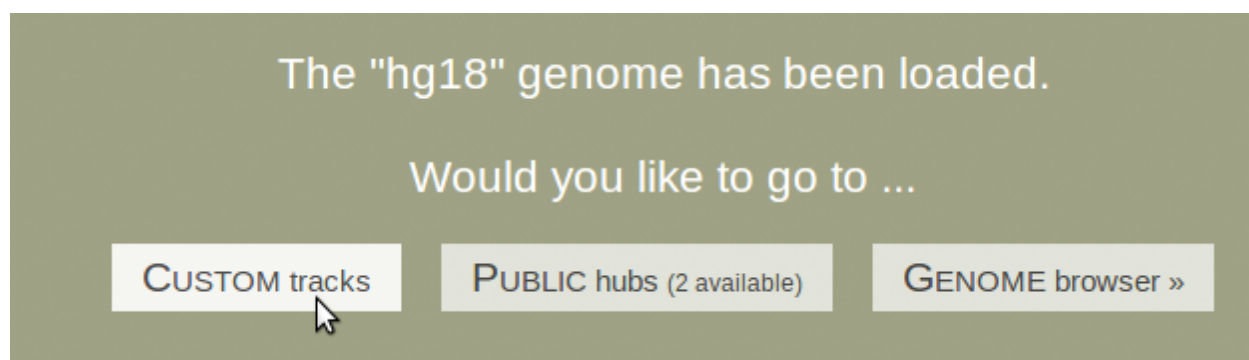

2. Choose "Datahub" from the options:

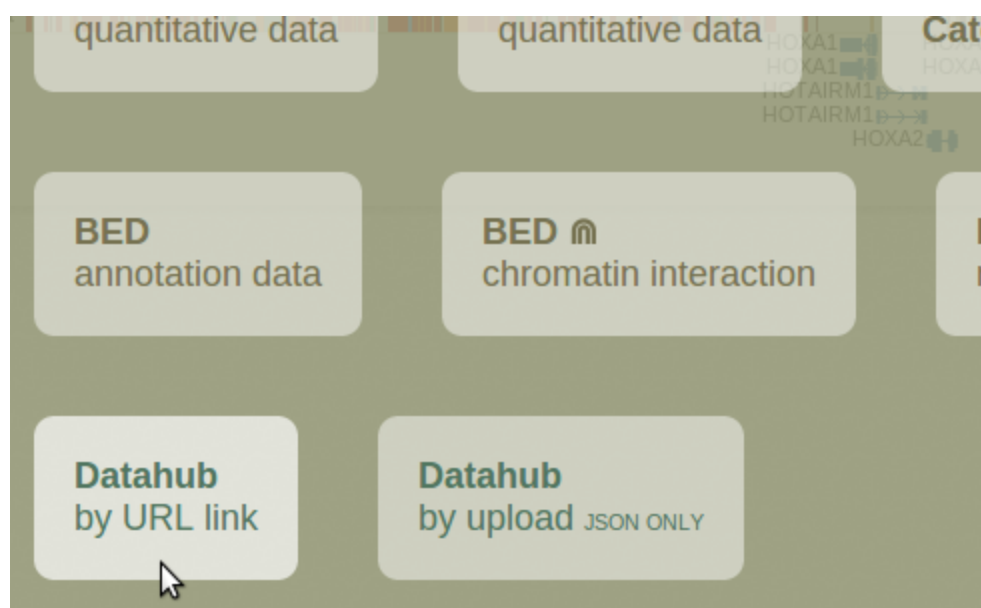

3. Enter the URL [http://vizhub.wustl.edu/public/hg18/methylC\\_sample](http://vizhub.wustl.edu/public/hg18/methylC_sample) into the text field. Choose "JSON" from the dropdown menu and submit:

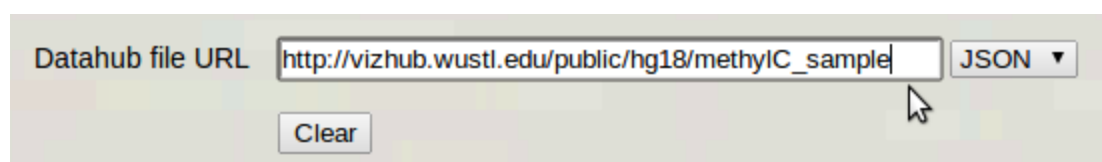

4. Now the methylC tracks are displayed. The two WGBS experiments are displayed as full blown methylC tracks, showing strand-specific information on position and methylation levels of CG/CHG/CHH cytosines, together with read depth across the whole region. Mouse over the track to see details about methylation status at specific position from the tooltip:



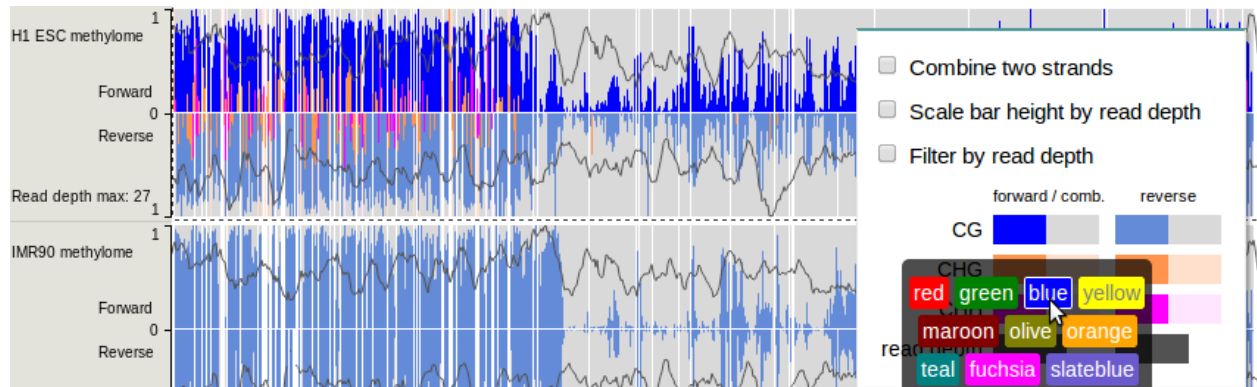

8. Similarly, click the color cell next to this one to assign yellow background for all CG di-nucleotides in the forward strand:

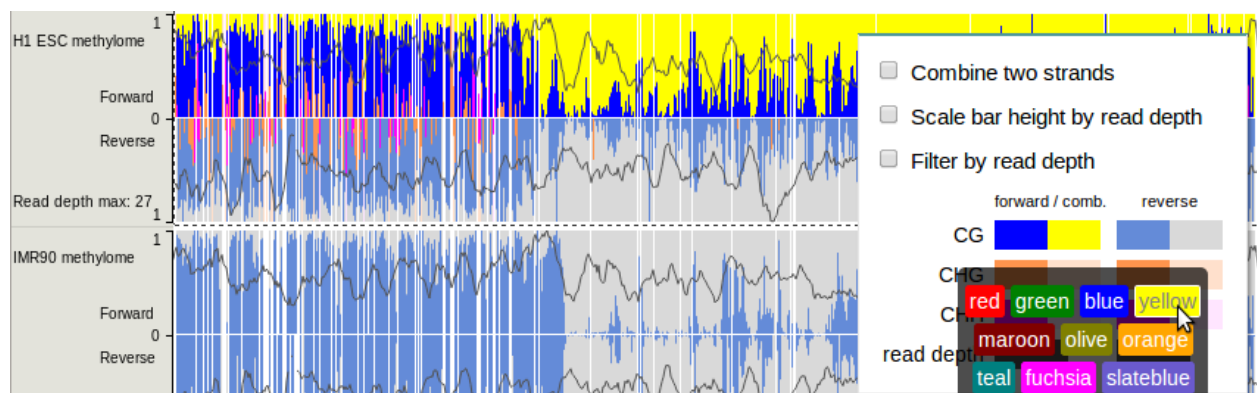

9. A minimum read depth cutoff can be applied, so that methylation calls will be filtered out if their underlying read depth is lower than minimum:

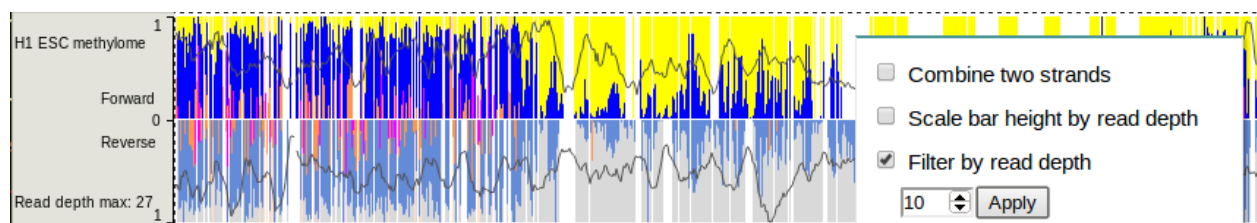

10. Finally you can tune the methylC track into a very different look compared with default style. Check the second checkbox in the menu to scale bar heights by read depth, and assign contrasting colors for CG background (yellow) and track background (dark gray):

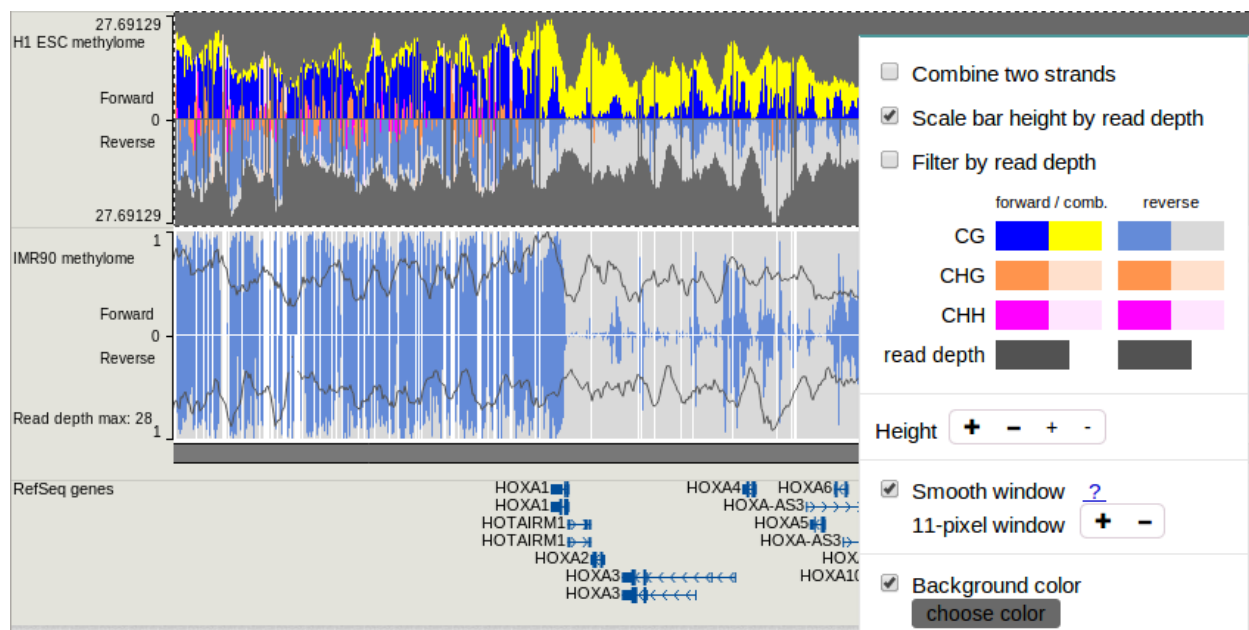

Supplement: supp_btu191_zhou_methylcTrack_supplements.pdf [file supp_btu191_zhou_methylcTrack_supplements.pdf]
